# Supplementary material for: Synthesis and Biological Evaluation of 1,3,8-Triazaspiro[4.5]decane-2,4-dione Derivatives as Myelostimulators
Source: Hindawi journal article supplement (doi:10.1155/2018/7346835), 2018-01-01
Supplement: f1 [file 7346835.f1.zip]

## Supplementary materials

**Table1.** Values obtained for the intact control animals (Figure 2, A).

| Value                                                                                                                                                                             | Intact control animals                                                 | 3-day administration of cyclophosphamide * |
|-----------------------------------------------------------------------------------------------------------------------------------------------------------------------------------|------------------------------------------------------------------------|--------------------------------------------|
| Red blood cells count                                                                                                                                                             | $(6.5 \pm 1.4) \cdot 10^{12}/L$                                        | $(4.93 \pm 1.3) \cdot 10^{12}/L$           |
| Hemoglobin                                                                                                                                                                        | $(140.7 \pm 1.2) \text{ g/L}$                                          | $(90.75 \pm 12.0) \text{ g/L}$             |
| Hematocrit                                                                                                                                                                        | $(39.8 \pm 1.9) \%$                                                    | $(21.21 \pm 2.58) \%$                      |
| Platelet count                                                                                                                                                                    | $(650.6 \pm 36.0) \cdot 10^9/L$                                        | $(70.5 \pm 4.3) \cdot 10^9/L$              |
| Trombocrit                                                                                                                                                                        | $(12.6 \pm 0.3) \%$                                                    |                                            |
| White blood cell count                                                                                                                                                            | $(10.18 \pm 1.11) \cdot 10^9/L$                                        | $(1.91 \div 2.44) \cdot 10^9/L$            |
| Lymphocytes cells                                                                                                                                                                 | $(5.18 \pm 1.1) \cdot 10^9/L$ with a percentage of $50.9 \pm 0.9 \%$   | $(21.1 \div 29.13) \%$                     |
| Granulocytic leucocytes cells                                                                                                                                                     | $(4.49 \pm 0.9) \cdot 10^9/L$ with a percentage of $(44.1 \pm 0.4) \%$ |                                            |
| Monocytes count                                                                                                                                                                   | $(0.52 \pm 0.01) \cdot 10^9/L$ with a percentage of $5.1 \pm 0.7 \%$   | $28.4 \pm 1.01 \%$                         |
| * Red blood cell count dropped in 1.32 times;<br>Hemoglobin level dropped in 1.6 times;<br>Hematocrit value dropped in 1.88 times;<br>Platelet cells count dropped in 9.22 times. |                                                                        |                                            |

**Table 2.** Total leukocyte count ( $\cdot 10^9/L$  of blood) of hemogram of animals after administration of the compounds **3, 8-11**

| Compound             | Day of administration of 3, 8-11 |                 |                  |                  |
|----------------------|----------------------------------|-----------------|------------------|------------------|
|                      | 1 <sup>st</sup>                  | 7 <sup>th</sup> | 21 <sup>st</sup> | 28 <sup>th</sup> |
| <b>3</b>             | $2.1 \pm 0.01$                   | $2.2 \pm 0.01$  | $4.3 \pm 0.01$   | $6.9 \pm 0.3$    |
| <b>8</b>             | $2.3 \pm 0.01$                   | $3.2 \pm 0.02$  | $6.5 \pm 0.01$   | $6.8 \pm 0.2$    |
| <b>9</b>             | $1.9 \pm 0.00$                   | $2.6 \pm 0.02$  | $4.7 \pm 0.02$   | $8.7 \pm 0.2$    |
| <b>10</b>            | $1.9 \pm 0.01$                   | $2.2 \pm 0.01$  | $4.2 \pm 0.1$    | $6.2 \pm 0.1$    |
| <b>11</b>            | $2.1 \pm 0.01$                   | $2.8 \pm 0.01$  | $4.6 \pm 0.02$   | $8.2 \pm 0.6$    |
| <b>Intact group</b>  | $10.2 \pm 0.5$                   | $10.2 \pm 0.9$  | $10.1 \pm 0.05$  | $10.1 \pm 0.8$   |
| <b>Control group</b> | $1.9 \pm 0.01$                   | $2.3 \pm 0.01$  | $2.3 \pm 0.01$   | $5.5 \pm 0.2$    |
| <b>Methyluracil*</b> | $2.3 \pm 0.2$                    | $3.2 \pm 0.01$  | $4.1 \pm 0.01$   | $6.2 \pm 0.3$    |

\*reference drug

**Table 3.** The relative granulocyte index (%) of the blood hemogram of animals after administration of the compounds **3, 8-11**

| Compound             | Day of administration of 3, 8-11 |                 |                  |                  |
|----------------------|----------------------------------|-----------------|------------------|------------------|
|                      | 1 <sup>st</sup>                  | 7 <sup>th</sup> | 21 <sup>st</sup> | 28 <sup>th</sup> |
| <b>3</b>             | $49.2 \pm 1.1$                   | $44.4 \pm 1.2$  | $46.4 \pm 1.6$   | $51.7 \pm 1.2$   |
| <b>8</b>             | $48.4 \pm 1.2$                   | $32.2 \pm 1.5$  | $54.9 \pm 1.5$   | $54.9 \pm 1.3$   |
| <b>9</b>             | $48.4 \pm 1.4$                   | $38.6 \pm 1.2$  | $48.1 \pm 1.2$   | $48.5 \pm 1.2$   |
| <b>10</b>            | $44.1 \pm 1.1$                   | $37.2 \pm 1.1$  | $46.1 \pm 1.1$   | $47.5 \pm 1.1$   |
| <b>11</b>            | $49.6 \pm 0.9$                   | $37.2 \pm 1.5$  | $49.6 \pm 1.2$   | $46.2 \pm 1.3$   |
| <b>Intact group</b>  | $44.4 \pm 1.3$                   | $44.4 \pm 1.1$  | $46.1 \pm 1.2$   | $42.4 \pm 1.2$   |
| <b>Control group</b> | $50.1 \pm 1.9$                   | $40.1 \pm 1.1$  | $42.0 \pm 1.1$   | $34.4 \pm 1.1$   |
| <b>Methyluracil*</b> | $52.1 \pm 1.9$                   | $44 \pm 1.2$    | $44.4 \pm 1.2$   | $49.8 \pm 1.3$   |

\*reference drug

**Table 4.** The relative monocytic-eosinophilic index (%) of blood hemogram of animals after administration of the compounds **3, 8-11**

| Compound             | Day of administration of 3, 8-11 |                 |                  |                  |
|----------------------|----------------------------------|-----------------|------------------|------------------|
|                      | 1 <sup>st</sup>                  | 7 <sup>th</sup> | 21 <sup>st</sup> | 28 <sup>th</sup> |
| <b>3</b>             | 27.4±1.2                         | 29.2±1.5        | 12.4±0.8         | 7.9±0.5          |
| <b>8</b>             | 22.5±1.4                         | 36.6±1.8        | 17.2±0.8         | 8.5±0.9          |
| <b>9</b>             | 28.4±1.5                         | 39±1.5          | 13.7±0.9         | 8.4±0.4          |
| <b>10</b>            | 22.4±1.2                         | 33.2±1.1        | 11.1±0.9         | 8.2±0.1          |
| <b>11</b>            | 22.0±1.8                         | 33.2±1.8        | 10.0±0.9         | 9.4±0.9          |
| <b>Intact group</b>  | 5.1±0.02                         | 4.4±0.01        | 1.8±0.8          | 3.2±0.02         |
| <b>Control group</b> | 28.8±1.4                         | 49.5±1.2        | 45.6±2.4         | 32.5±1.1         |
| <b>Methyluracil*</b> | 20.8±1.2                         | 25.9±1.2        | 21.2±1.1         | 13.4±0.9         |

\*reference drug

**Table 5.** The relative lymphocyte index (%) of the blood hemogram of animals after administration of the compounds **3, 8-11**

| Compound             | Day of administration of 3, 8-11 |                 |                  |                  |
|----------------------|----------------------------------|-----------------|------------------|------------------|
|                      | 1 <sup>st</sup>                  | 7 <sup>th</sup> | 21 <sup>st</sup> | 28 <sup>th</sup> |
| <b>3</b>             | 23.4±1.0                         | 28.4±1.2        | 41.2±1.4         | 40.4±0.9         |
| <b>8</b>             | 29.1±1.3                         | 31.2±0.8        | 35.1±1.4         | 36.6±0.9         |
| <b>9</b>             | 23.2±0.9                         | 22.4±1.1        | 38.2±1.3         | 43.1±0.8         |
| <b>10</b>            | 23.5±1.1                         | 22.8±1.0        | 35.2±1.0         | 41.2±1.1         |
| <b>11</b>            | 28.4±1.2                         | 39.6±0.8        | 40.4±0.9         | 44.4±0.1         |
| <b>Intact group</b>  | 50.9±1.0                         | 50.2±0.9        | 52.1±1.3         | 54.4±0.8         |
| <b>Control group</b> | 21.1±1.3                         | 10.4±1.4        | 12.4±1.2         | 33.1±1.4         |
| <b>Methyluracil*</b> | 27.1±1.0                         | 30.1±1.1        | 34.4±1.0         | 36.8±0.5         |

\*reference drug

**Table 6.** The monocyte index ( $\cdot 10^6/\mu\text{L}$ ) of bone marrow myelogram of animals after administration of compounds **3, 9, 11**

| Compound                         | Day of administration of 3, 9, 11 |          |          |          |          |          |          |
|----------------------------------|-----------------------------------|----------|----------|----------|----------|----------|----------|
|                                  | 2                                 | 4(1)     | 6(3)     | 8(5)     | 10(7)    | 14(11)   | 21(18)   |
| <b>3</b>                         | 0.3±0.00                          | 0.5±0.01 | 1.6±0.02 | 1.2±0.01 | 2.2±0.02 | 2±0.00   | 4±0.02   |
| <b>9</b>                         | 0.2±0.01                          | 0.5±0.01 | 1.4±0.01 | 1.1±0.01 | 1.8±0.01 | 2.2±0.01 | 4.6±0.02 |
| <b>11</b>                        | 0.2±0.01                          | 0.6±0.01 | 1.9±0.01 | 1.2±0.01 | 3.1±0.00 | 2.2±0.01 | 5.1±0.02 |
| <b>Methyluracil*</b>             | 0.2±0.01                          | 0.4±0.01 | 0.8±0.01 | 0.9±0.01 | 0.9±0.01 | 1.8±0.00 | 2±0.01   |
| <b>Control group</b>             | 0.3±0.01                          | 0.5±0.01 | 0.8±0.02 | 0.5±0.01 | 0.4±0.02 | 0.8±0.01 | 1.5±0.01 |
| <b>Placebo (saline solution)</b> | 0.2±0.00                          | 0.4±0.01 | 0.7±0.01 | 0.4±0.01 | 0.8±0.02 | 1.2±0.01 | 1.5±0.00 |
| <b>Intact group</b>              | 3.9±0.03                          | 3.9±0.00 | 4±0.01   | 4.2±0.01 | 3.8±0.01 | 4.2±0.01 | 3.8±0.00 |

\*reference drug

**Table 7.** Myelokaryocytic index ( $\cdot 10^6/\mu\text{L}$ ) of bone marrow myelogram of animals after administration of compounds **3, 9, 11**

| Compound             | Day of administration of 3, 9, 11 |         |          |          |          |          |          |
|----------------------|-----------------------------------|---------|----------|----------|----------|----------|----------|
|                      | 2                                 | 4(1)    | 6(3)     | 8(5)     | 10(7)    | 14(11)   | 21(18)   |
| <b>3</b>             | 5.2±0.02                          | 8.1±0.7 | 12.2±1.2 | 14.1±1.2 | 16.2±1.1 | 18.4±1.2 | 14.1±1.5 |
| <b>9</b>             | 4.9±0.01                          | 8.8±0.8 | 11.8±0.9 | 13.9±1.1 | 18.2±1.2 | 19.1±1.4 | 15±0.9   |
| <b>11</b>            | 4.9±0.01                          | 8.9±0.8 | 13.4±1.0 | 16.7±1.3 | 19.1±1.1 | 22.4±2.1 | 18.2±1.3 |
| <b>Methyluracil*</b> | 4.8±0.01                          | 8.4±0.8 | 10.2±0.9 | 8.9±0.9  | 8.4±1.2  | 6.8±0.9  | 10.4±0.8 |

|                                  |          |          |          |          |          |          |          |
|----------------------------------|----------|----------|----------|----------|----------|----------|----------|
| <b>Control group</b>             | 5.2±0.5  | 5.4±0.4  | 12.2±0.8 | 11.8±1.1 | 10.4±0.9 | 10.5±1.9 | 15.2±1.2 |
| <b>Placebo (saline solution)</b> | 5.1±0.6  | 5.2±0.5  | 10.2±0.9 | 10±0.9   | 8.2±0.9  | 10.2±1.2 | 13±1.1   |
| <b>Intact group</b>              | 18.2±0.9 | 18.4±1.2 | 18±1.2   | 17.9±2.1 | 18±1.2   | 17.8±1.2 | 17.9±0.9 |

\*reference drug

**Table 8.** The granulocyte index ( $\cdot 10^6/\mu\text{L}$ ) of bone marrow myelogram of animals after administration of the compounds **3, 9, 11**

| <b>Compound</b>                  | <b>Day of administration of 3, 9, 11</b> |             |             |             |              |               |               |
|----------------------------------|------------------------------------------|-------------|-------------|-------------|--------------|---------------|---------------|
|                                  | <b>2</b>                                 | <b>4(1)</b> | <b>6(3)</b> | <b>8(5)</b> | <b>10(7)</b> | <b>14(11)</b> | <b>21(18)</b> |
| <b>3</b>                         | 2.9±0.01                                 | 4.5±0.01    | 5.2±0.01    | 14.2±0.8    | 13.4±0.8     | 14.4±1.0      | 9.8±0.9       |
| <b>9</b>                         | 2.9±0.01                                 | 4.3±0.01    | 9.1±0.01    | 12.8±0.9    | 13.1±0.9     | 16.2±1.1      | 11.2±0.9      |
| <b>11</b>                        | 2.6±0.00                                 | 4.8±0.00    | 12.1±0.08   | 18.3±0.9    | 21.3±0.8     | 20.4±1.1      | 14.6±1.1      |
| <b>Methyluracil*</b>             | 2.7±0.01                                 | 8±0.01      | 4.9±0.00    | 10.4±0.5    | 8.4±0.5      | 9.4±0.9       | 10.1±0.9      |
| <b>Control group</b>             | 2.9±0.00                                 | 3.2±0.01    | 5.1±0.01    | 10.1±0.6    | 8.4±0.6      | 7.9±0.9       | 8.2±0.9       |
| <b>Placebo (saline solution)</b> | 2.8±0.01                                 | 3±0.01      | 5.1±0.02    | 4.5±0.2     | 8.4±0.4      | 7.9±0.9       | 9.9±0.9       |
| <b>Intact group</b>              | 7.9±0.01                                 | 8.2±0.03    | 7.9±0.8     | 8±0.5       | 8.2±0.4      | 8.2±0.9       | 8.3±0.9       |

\*reference drug

**Table 9.** The total erythrocyte index ( $\cdot 10^6/\mu\text{L}$ ) of bone marrow myelogram of animals after administration of the compounds **3, 9, 11**

| <b>Compound</b>                  | <b>Day of administration of 3, 9, 11</b> |             |             |             |              |               |               |
|----------------------------------|------------------------------------------|-------------|-------------|-------------|--------------|---------------|---------------|
|                                  | <b>2</b>                                 | <b>4(1)</b> | <b>6(3)</b> | <b>8(5)</b> | <b>10(7)</b> | <b>14(11)</b> | <b>21(18)</b> |
| <b>3</b>                         | 1.3±0.02                                 | 1.8±0.01    | 2.2±0.0     | 2.8±0.01    | 2.5±0.01     | 4±0.01        | 4.2±0.01      |
| <b>9</b>                         | 1.4±0.01                                 | 2±0.02      | 2.3±0.0     | 2.8±0.2     | 2.8±0.01     | 4.2±0.01      | 4.5±0.01      |
| <b>11</b>                        | 1.5±0.01                                 | 2±0.00      | 2.3±0.0     | 2.9±0.01    | 2.5±0.05     | 4.3±0.01      | 4.5±0.01      |
| <b>Methyluracil*</b>             | 1.4±0.00                                 | 1.9±0.1     | 2.4±0.02    | 2.5±0.2     | 2.9±0.2      | 4.1±0.02      | 3.9±0.01      |
| <b>Control group</b>             | 1.2±0.01                                 | 1.8±0.1     | 2.1±0.00    | 2.4±0.05    | 2.5±0.2      | 4.2±0.02      | 4.3±0.00      |
| <b>Placebo (saline solution)</b> | 1.3±0.01                                 | 1.5±0.09    | 2±0.0       | 2.9±0.06    | 3±0.05       | 4.5±0.02      | 4.6±0.01      |
| <b>Intact group</b>              | 4.8±0.3                                  | 4.9±0.08    | 5±0.8       | 4.7±0.05    | 5.2±0.05     | 4.6±0.02      | 5±0.6         |

\*reference drug
