# Supplementary material for: Synthesis and Biological Evaluation of 1,3,8-Triazaspiro[4.5]decane-2,4-dione Derivatives as Myelostimulators
Source: Hindawi journal article supplement (doi:10.1155/2018/7346835), 2018-01-01
Supplement: f1 [file 7346835.f1.zip]

Archive with 2 entries (2 files):
- 7346835_SupplDesc.docx
- mat.7346835.v3.pdf
