# Supplementary material for: Synthesis and Biological Evaluation of 1,3,8-Triazaspiro[4.5]decane-2,4-dione Derivatives as Myelostimulators
Source: Hindawi journal article supplement (doi:10.1155/2018/7346835), 2018-01-01
Supplement: f1 [file 7346835.f1.zip › 7346835_SupplDesc.docx]

**Supplementary materials**

**Table1.** Values obtained for the intact control animals (Figure 2, А).

**Table 2.** Total leukocyte count (·109 /L of blood) of hemogram of animals after administration of the compounds **3**, **8-11**

**Table 3.** The relative granulocyte index (%) of the blood hemogram of animals after administration of the compounds **3**, **8-11**

**Table 4.** The relative monocytic-eosinophilic index (%) of blood hemogram of animals after administration of the compounds **3**, **8-11**

**Table 5.** The relative lymphocyte index (%) of the blood hemogram of animals after administration of the compounds **3**, **8-11**

**Table 6.** The monocyte index (·106/μL) of bone marrow myelogram of animals after administration of compounds **3**, **9**, **11**

**Table 7.** Myelokaryocytic index (·106/μL) of bone marrow myelogram of animals after administration of compounds **3**, **9**, **11**

**Table 8.** The granulocyte index (·106/μL) of bone marrow myelogram of animals after administration of the compounds **3**, **9**, **11**

**Table 9.** The total erythrocyte index (·106/μL) of bone marrow myelogram of animals after administration of the compounds **3**, **9**, **11**
